# Supplementary material for: A Simple Drug Delivery System for Platelet-Derived Bioactive Molecules, to Improve Melanocyte Stimulation in Vitiligo Treatment
Source: MDPI journal article supplement (doi:10.3390/nano10091801), 2020-09-10
Supplement: s1 [file s1]

# A Simple Drug Delivery System for Platelet-Derived Bioactive Molecules, to Improve Melanocyte Stimulation in Vitiligo Treatment

**Table S1.** Concentration of the determined analytes in the platelet concentrate. LOQ stands for limit of quantification.

| Pro-inflammatory cytokines  |         |                         |
|-----------------------------|---------|-------------------------|
|                             | IL-1b   | 1.7 ±0.3 pg/mL          |
|                             | IL-2    | 7.1 ±1.2 pg/mL          |
|                             | IL-6    | 15.6 ±4.0 pg/mL         |
|                             | IL-7    | 14.8 ±1.1 pg/mL         |
|                             | IL-8    | 19.2 ±1.2 pg/mL         |
|                             | IL-9    | 95.4 ±3.1 pg/mL         |
|                             | IL-12   | <LOQ                    |
|                             | IL-15   | 223.3 ±15.1 pg/mL       |
|                             | IL-17   | 17.7 ±1.1 pg/mL         |
|                             | IFN-γ   | 9.7 ±1.2 pg/mL          |
|                             | TNF-α   | 57.2 ±3.5 pg/mL         |
| Anti-inflammatory cytokines |         |                         |
|                             | IL-1ra  | 214.8± 13.1 pg/mL       |
|                             | IL-4    | 1.2 ±0.1 pg/mL          |
|                             | IL-5    | 39.4 ±5.3 pg/mL         |
|                             | IL-10   | <LOQ                    |
|                             | IL-13   | <LOQ                    |
| Chemokines                  |         |                         |
|                             | Eotaxin | 23.3 ±0.8 pg/mL         |
|                             | IP-10   | 225.0 ±5.4 pg/mL        |
|                             | MCP-1   | 12.3 ±1.2 pg/mL         |
|                             | MIP-1a  | 1.3 ±0.1 pg/mL          |
|                             | MIP-1b  | 1,426.8 ±105.2 pg/mL    |
|                             | RANTES  | 15,982.6 ±1,729.8 pg/mL |
| Growth factors              |         |                         |
|                             | IGF-1   | 32.4 ng/mL              |
|                             | TGF-β1  | 17,569.9 ±1,507.8 pg/mL |
|                             | bFGF    | 67.7 ±4.7 pg/mL         |
|                             | G-CSF   | 73.6 ±12.5 pg/mL        |
|                             | GM-CSF  | 6.0 ±1.0 pg/mL          |
|                             | PDGF-BB | 1,125.5 ±55.6 pg/mL     |
|                             | VEGF    | 294.7 ±48.1 pg/mL       |

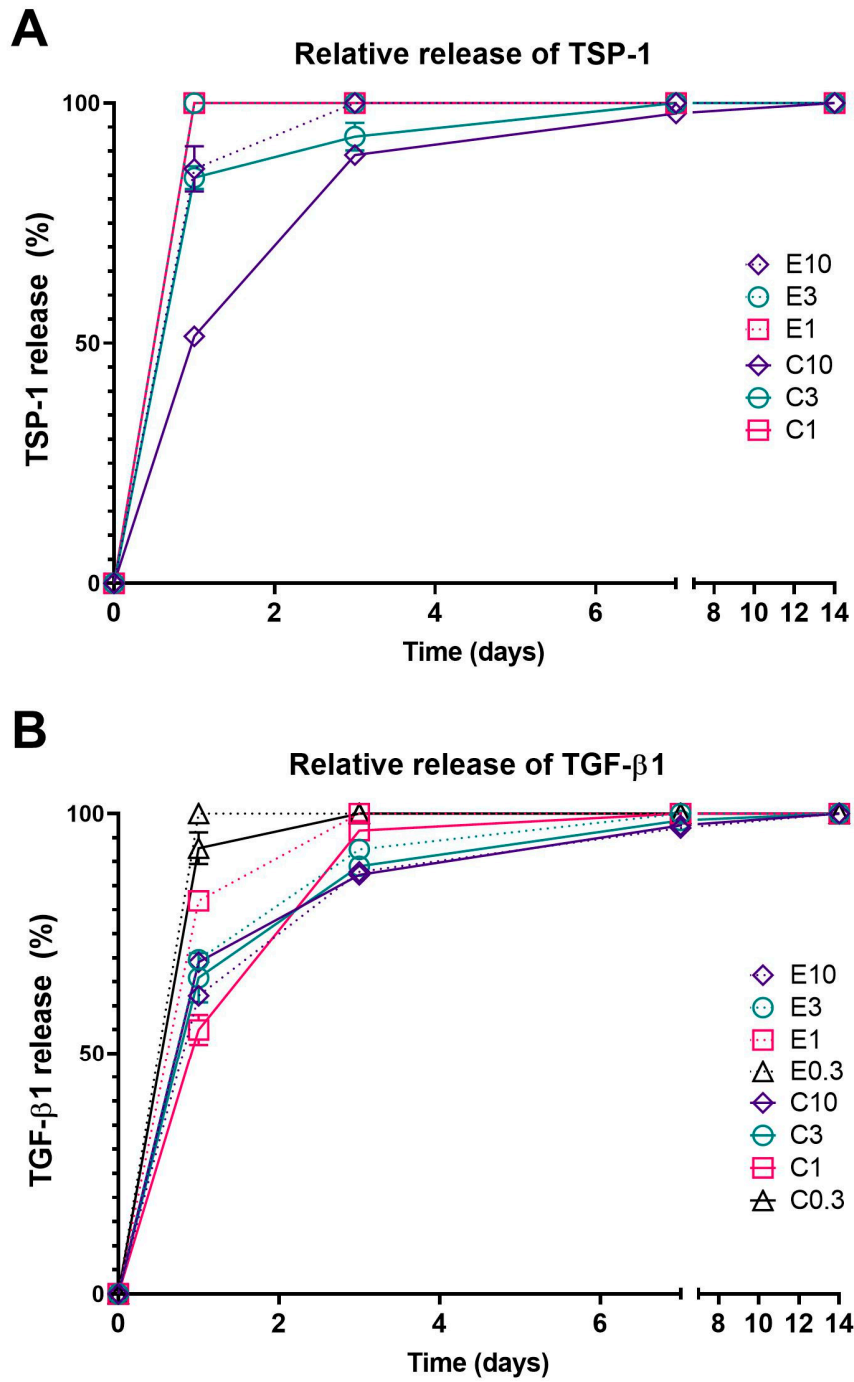

**Figure S1** Relative release of TSP-1 (A) and TGF- $\beta$ 1 (B) from the electrospun (E) and centrifugally spun (C) scaffolds.

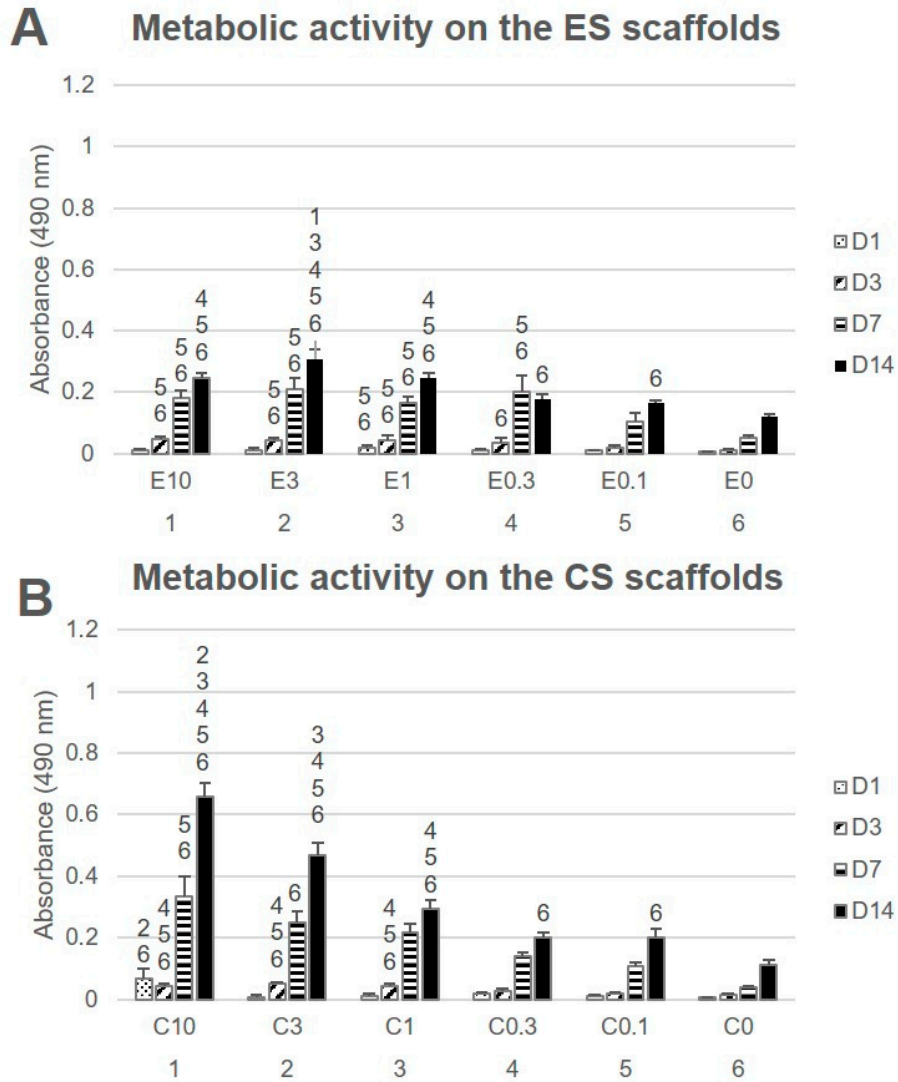

**Figure S2** Metabolic activity of melanocytes seeded on the electrospun and centrifugally spun scaffolds. A – Metabolic activity of melanocytes seeded on the electrospun PCL scaffolds (statistical analysis  $p < 0.05$ ). B – Metabolic activity of melanocytes seeded on the centrifugally spun PCL scaffolds (statistical analysis  $p < 0.05$ ). The level of significance is denoted by the numbers above the bars in the graph. E stands for electrospun, C stands for centrifugally spun and the number indicates the fold change of the physiological concentration of platelets ( $300 \times 10^9$  platelets/L).

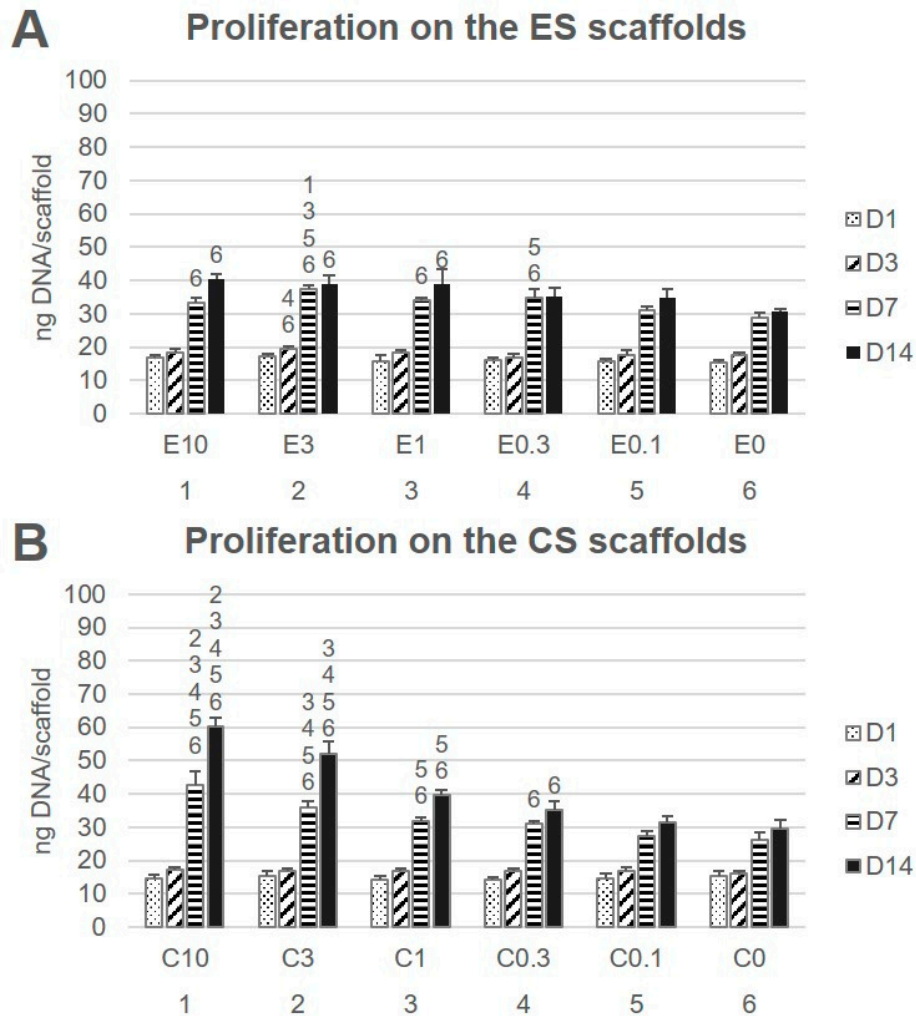

**Figure S3** Proliferation of melanocytes seeded on the electrospun and centrifugally spun scaffolds. A – Proliferation of melanocytes seeded on the electrospun PCL scaffolds (statistical analysis  $p < 0.05$ ). B – Proliferation of melanocytes seeded on the centrifugally spun PCL scaffolds (statistical analysis  $p < 0.05$ ). The level of significance is denoted by the numbers above the bars in the graph. E stands for electrospun, C stands for centrifugally spun and the number indicates the fold change of the physiological concentration of platelets ( $300 \times 10^9$  platelets/L).

| Day 7                | 10PC                                                                              | 3PC                                                                               | PC                                                                                | 0.3PC                                                                              | 0.1PC                                                                               | Control                                                                             |
|----------------------|-----------------------------------------------------------------------------------|-----------------------------------------------------------------------------------|-----------------------------------------------------------------------------------|------------------------------------------------------------------------------------|-------------------------------------------------------------------------------------|-------------------------------------------------------------------------------------|
| Electrospinning      |  |  |  |  |  |  |
| Centrifugal spinning |  |  |  |  |  |  |

  

| Day 14               | 10PC                                                                              | 3PC                                                                               | PC                                                                                | 0.3PC                                                                              | 0.1PC                                                                               | Control                                                                             |
|----------------------|-----------------------------------------------------------------------------------|-----------------------------------------------------------------------------------|-----------------------------------------------------------------------------------|------------------------------------------------------------------------------------|-------------------------------------------------------------------------------------|-------------------------------------------------------------------------------------|
| Electrospinning      |  |  |  |  |  |  |
| Centrifugal spinning |  |  |  |  |  |  |

**Figure S4** Visualization of melanin synthesis on the electrospun and centrifugally spun fibrous scaffolds.
